# Supplementary material for: The Influence of Solvents and Colloidal Particles on the Efficiency of Molecular Antioxidants
Source: MDPI journal article supplement (doi:10.3390/antiox12010099), 2022-12-31
Supplement: s1 [file s1]

## **Supplementary Materials (SM)**

### **The Influence of Solvents and Colloidal Particles on the Efficiency of Molecular Antioxidants**

**Bojana Katana<sup>1</sup>, Kata Panna Kókai<sup>1</sup>, Szilárd Sáringer<sup>1</sup>, Adél Szerlauth<sup>1</sup>, Dóra Takács<sup>1</sup>, and István Szilágyi<sup>1,\*</sup>**

<sup>1</sup>MTA-SZTE Lendület Biocolloids Research Group, Department of Physical Chemistry and Materials Science, Interdisciplinary Excellence Center, University of Szeged, H-6720 Szeged, Hungary

\*Corresponding author. Email: szistvan@chem.u-szeged.hu

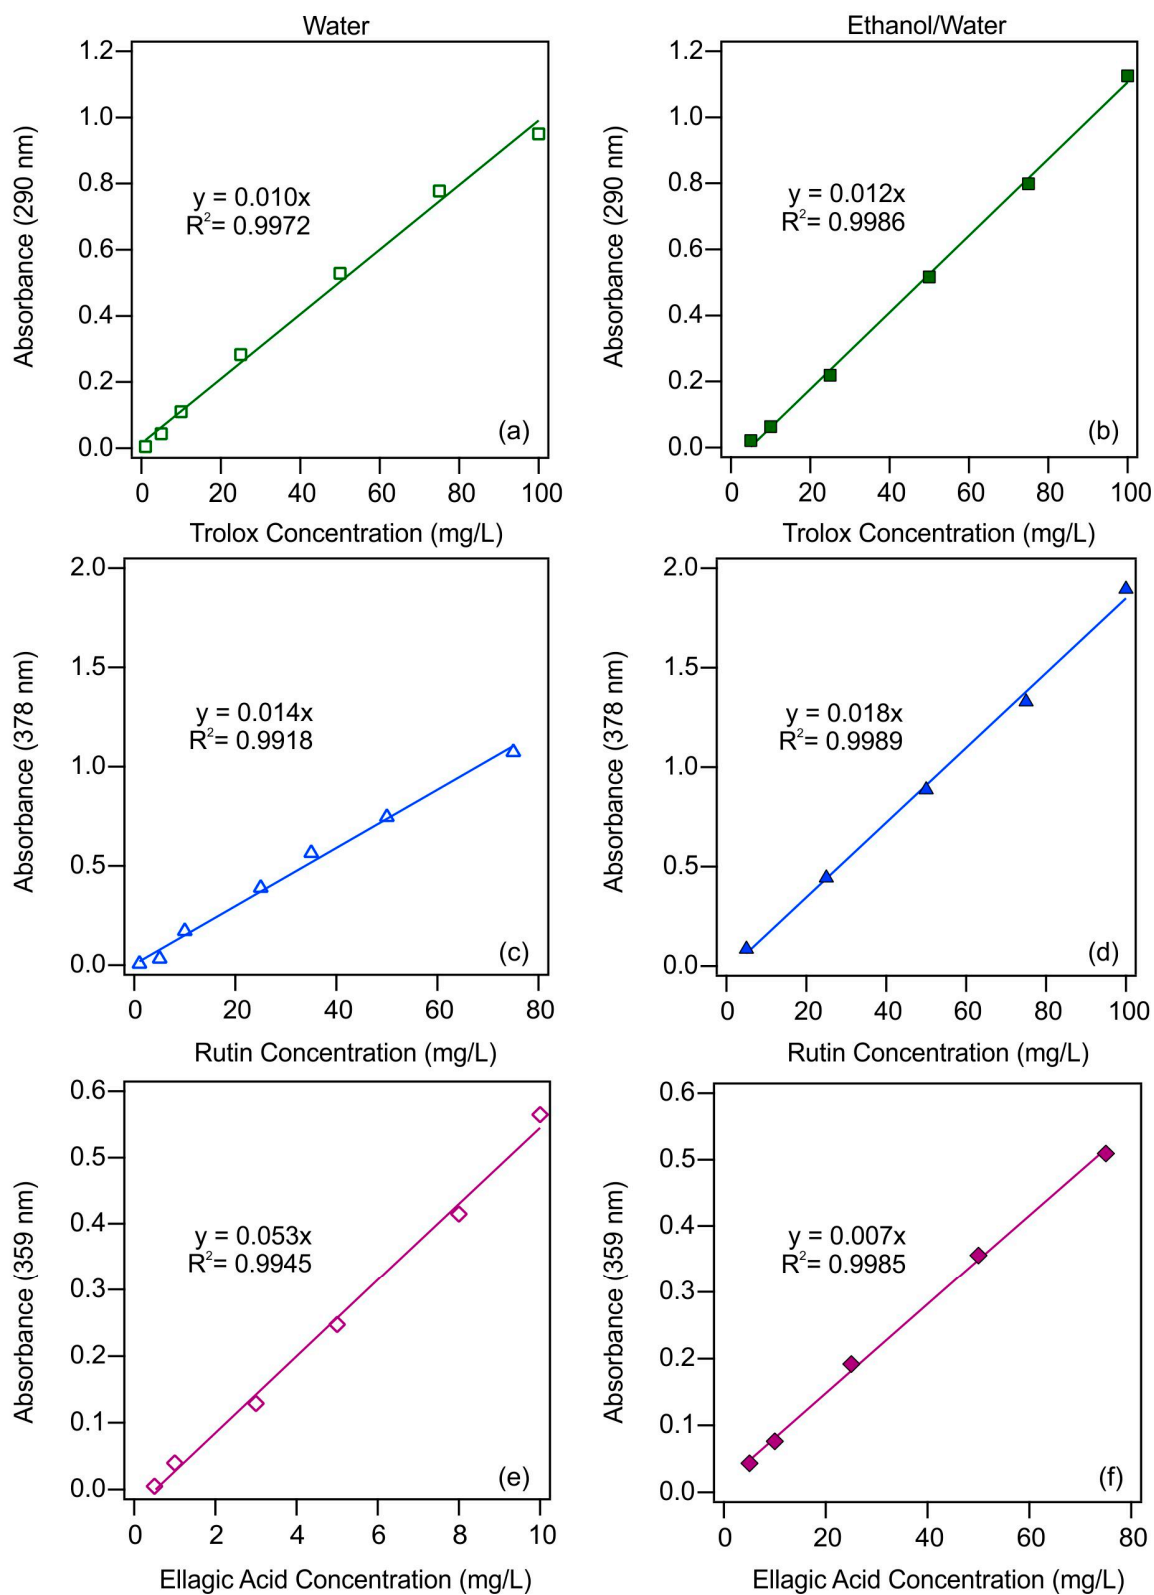

**Figure S1.** Calibration curves for antioxidants in water (left column) and in ethanol/water (right column) obtained at the wavelength corresponding to the absorption maxima determined for each antioxidant.

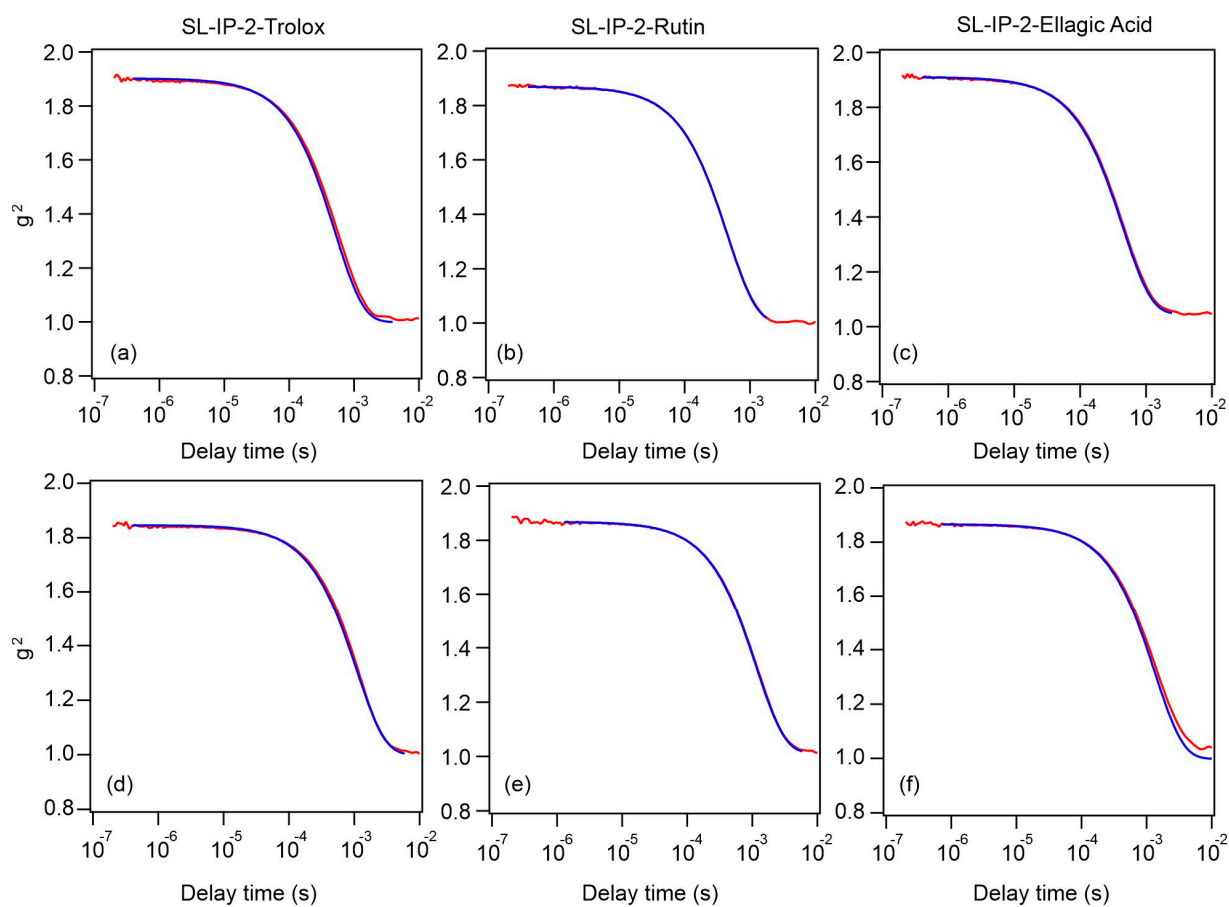

**Figure S2.** Intensity correlation function ( $g^2$ ) versus the delay time for SL-IP-2-Trolox, SL-IP-2-Rutin, and SL-IP-2-Ellagic acid systems in water (a-c), and in ethanol/water (d-f). The antioxidant dose in all systems was maintained at 100 mg/g. The red solid line refers to the correlation function, and blue solid line represents the Cumulant fit.

**Table S1.** Characteristic size and charge data of the bare SL particles and SL-IP-2 in water.

| Compound | $R_h^a$ (nm) | $EM^a$ ( $10^{-8}$ m <sup>2</sup> /Vs) | $PDI^a$ (%) | IP-2 dose <sup>b</sup> (mg/g) |
|----------|--------------|----------------------------------------|-------------|-------------------------------|
| SL       | 137          | -3.96                                  | 7.3         | -                             |
| SL-IP-2  | 143          | 1.87                                   | 10.2        | 300                           |

<sup>a</sup>Hydrodynamic radius ( $R_h$ ), electrophoretic mobility (EM), and polydispersity index (PDI) were measured by light scattering at 1 mM ionic strength. The average errors of the measurements are  $\pm 6$  nm and  $\pm 3.2\%$  for the  $R_h$  and PDI, respectively, while for the electrophoretic mobilities the average error is about 10%. <sup>b</sup>IP-2 dose refers to the polymer concentration in terms of mg of IP-2 per 1 g of SL.

**Table S2.** The hydrodynamic radius ( $R_h$ ), polydispersity index (PDI), and electrophoretic mobility (EM) data of SL-IP-2 with 100 mg/g dose of antioxidants. Effective concentrations and minimum DPPH% values are also presented.

| System                                                                             | SL-IP-2-Trolox                                                                     |                       | SL-IP-2-Rutin                                                                      |                       | SL-IP-2-Ellagic Acid                                                                 |                       |
|------------------------------------------------------------------------------------|------------------------------------------------------------------------------------|-----------------------|------------------------------------------------------------------------------------|-----------------------|--------------------------------------------------------------------------------------|-----------------------|
| Antioxidant structure                                                              | 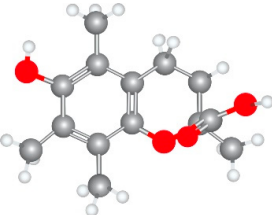 |                       |  |                       |  |                       |
| solvent                                                                            | H <sub>2</sub> O                                                                   | EtOH/H <sub>2</sub> O | H <sub>2</sub> O                                                                   | EtOH/H <sub>2</sub> O | H <sub>2</sub> O                                                                     | EtOH/H <sub>2</sub> O |
| <sup>a</sup> $R_h$<br>(nm)                                                         | 147                                                                                | 431                   | 142                                                                                | 426                   | 142                                                                                  | 476                   |
| <sup>a</sup> $PDI$ (%)                                                             | 6.88                                                                               | 12.11                 | 7.64                                                                               | 14.70                 | 13.87                                                                                | 18.78                 |
| <sup>b</sup> $EM$<br>( $10^{-8}$ m <sup>2</sup> V <sup>-1</sup> ·s <sup>-1</sup> ) | 0.42                                                                               | 1.53                  | 0.48                                                                               | 1.51                  | 0.59                                                                                 | 1.43                  |
| <sup>c</sup> $EC_{50}$<br>(mg/L)                                                   | -                                                                                  | 3.0                   | -                                                                                  | 21.2                  | -                                                                                    | 0.9                   |
| minimum<br>DPPH%                                                                   | 54.8                                                                               | 0.3                   | 60.1                                                                               | 47.3                  | 89.6                                                                                 | 5.4                   |

<sup>a</sup>Hydrodynamic radius ( $R_h$ ) and polydispersity index (PDI) values were determined by DLS. The measurement errors are  $\pm 7$  nm, and  $\pm 2.50\%$  for  $R_h$  and PDI, respectively. <sup>b</sup>Electrophoretic mobility (EM) was measured by light scattering in 1 mM KCl concentration with an average error of 10%. <sup>c</sup>The effective concentration ( $EC_{50}$ ) values were determined in the DPPH assay with an average error of 5%.
